# Supplementary material for: Halloysite nanotubes enhance the mechanical properties and thermal stability of iridescent cellulose nanocrystal films
Source: Royal Society of Chemistry journal article supplement (doi:10.1039/d3dt00498h), 2023-01-01
Supplement: d3dt00498h1.pdf [file d3dt00498h1.pdf]

## Supporting Information

### **Halloysite Nanotubes Enhance the Mechanical Properties and Thermal Stability of Iridescent Cellulose Nanocrystal Films**

Huan Gao,<sup>a,b</sup> Miguel A. Soto,<sup>a</sup> Joanna K. Szymkowiak,<sup>a</sup> Lucas J. Andrew,<sup>a</sup> Wadood Y. Hamad<sup>c</sup> and Mark J. MacLachlan<sup>a,d,e,f\*</sup>

<sup>a</sup> *Department of Chemistry, University of British Columbia, 2036 Main Mall, Vancouver, British Columbia, V6T 1Z1, Canada.*

<sup>b</sup> *Jiangsu Collaborative Innovation Center of Biomedical Functional Materials and Jiangsu Key Laboratory of Biofunctional Materials, School of Chemistry and Materials Science, Nanjing Normal University, Nanjing, 210023, China*

<sup>c</sup> *Transformation and Interfaces Group, Bioproducts, FPInnovations, 2665 East Mall, Vancouver, British Columbia, V6T 1Z4, Canada*

<sup>d</sup> *Stewart Blusson Quantum Matter Institute, University of British Columbia, 2355 East Mall, Vancouver, BC, V6T 1Z4 Canada*

<sup>e</sup> *WPI Nano Life Science Institute, Kanazawa University, Kanazawa, 920-1192, Japan*

<sup>f</sup> *Bioproducts Institute, University of British Columbia, 2360 East Mall, Vancouver, British Columbia, V6T 1Z3, Canada*

[mmaclach@chem.ubc.ca](mailto:mmaclach@chem.ubc.ca)

## Table of Contents

|                                                |    |
|------------------------------------------------|----|
| 1. TEM image of CNCs.....                      | S2 |
| 2. TEM image of HNTs.....                      | S2 |
| 3. Photographs of HNT and CNC suspensions..... | S3 |
| 4. Zeta potentials.....                        | S3 |
| 5. Mapping images of films.....                | S4 |
| 6. FTIR spectra.....                           | S5 |
| 7. Photographs, SEM images and POM images..... | S5 |
| 8. Normalized CD and reflectance spectra.....  | S6 |

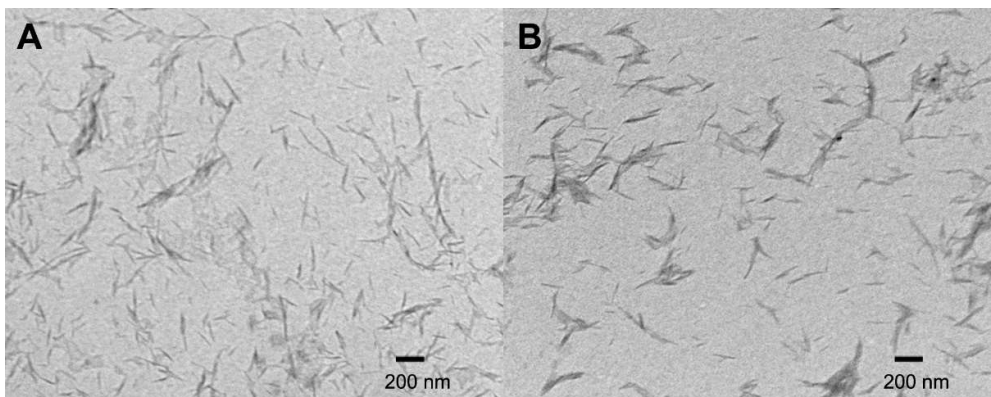

**Fig. S1** TEM images of CNC1 (A) and CNC2 (B).

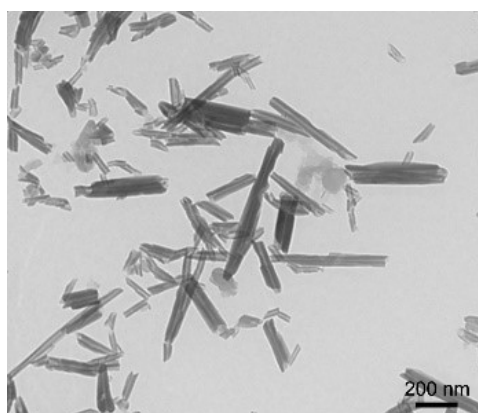

**Fig. S2** TEM image of HNTs.

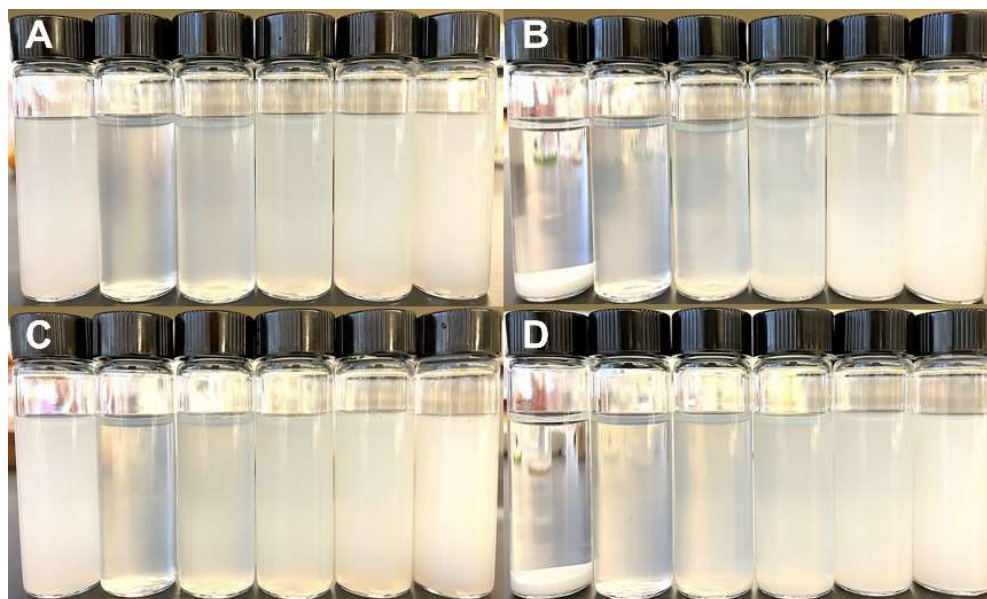

**Fig. S3** Photographs (from left to right) of HNTs, **CNC1**, **CNC1** mixed with 1 wt. %, 3 wt. %, 5 wt. % and 10 wt. % HNTs suspensions before (A) and after (B) standing for one day. Photographs (from left to right) of HNTs, **CNC2**, and **CNC2** mixed with 1 wt. %, 3 wt. %, 5 wt. %, and 10 wt. % HNTs suspensions before (C) and after (D) standing for one day.

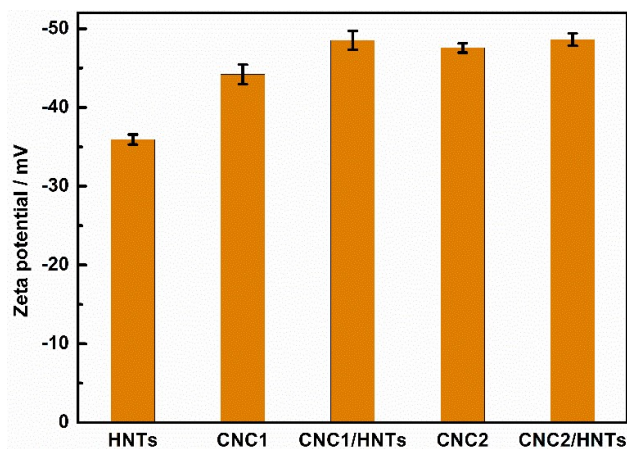

**Fig. S4** Zeta potentials of HNTs, **CNC1**, **CNC1/HNTs**, **CNC2** and **CNC2/HNTs** suspensions. Error bars are the standard deviation of measurements on three samples.

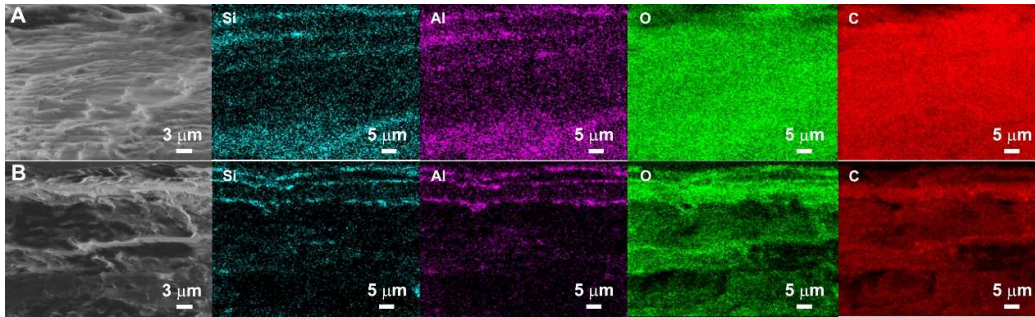

**Fig. S5** (A, B) SEM images and corresponding SEM-EDS mapping of CNC1 mixed with 5 wt. % HNTs composite film. A and B correspond to two different regions of the film.

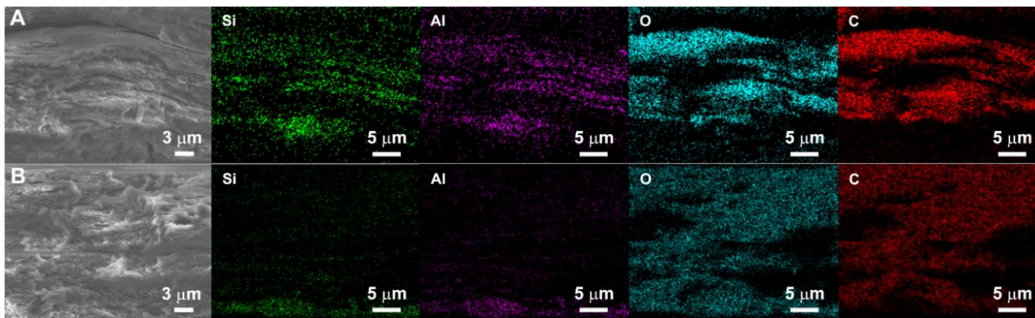

**Fig. S6** (A, B) SEM images and corresponding SEM-EDS mapping of CNC1 mixed with 10 wt. % HNTs composite film. A and B correspond to two different regions of the film.

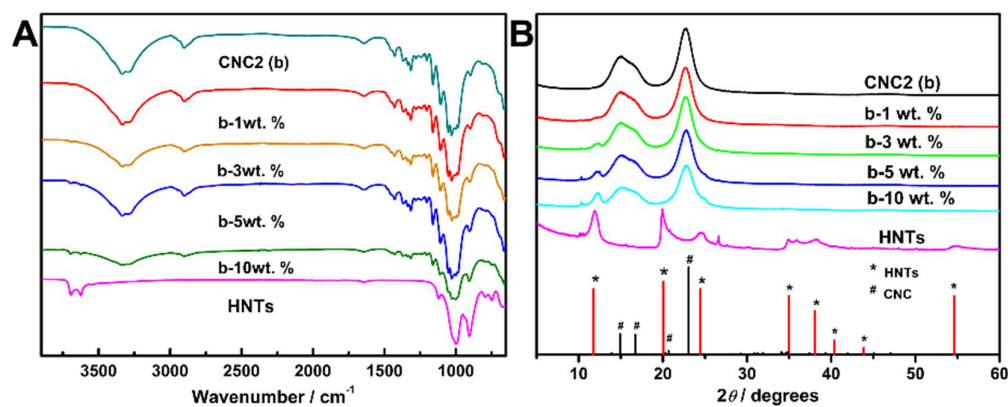

**Fig. S7** (A) FTIR spectra and (B) PXRD patterns of films prepared from HNTs and CNC2. The spectral traces correspond to: film made from CNC2 (B) and CNC2 mixed with 1 wt. %, 3 wt. %, 5 wt. % and 10 wt. % HNTs. Standard cards of HNTs (01-081-9524) and CNCs (00-056-1718) are from the JCPD database.

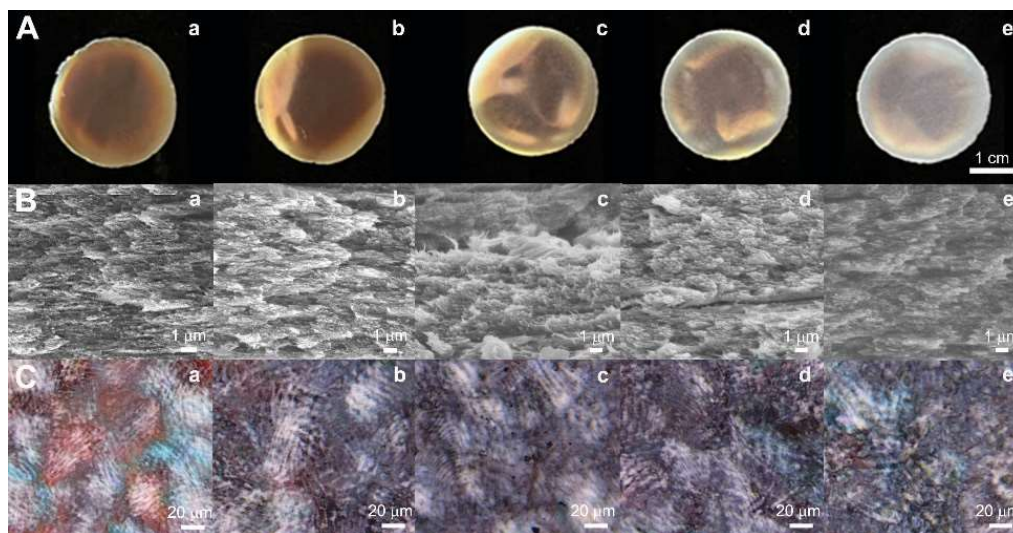

**Fig. S8** (A) Photographs of prepared films, (B) SEM images, and (C) POM images of the series of composite films made using CNC2. Panels a to e: CNC2 film (a), composite films made from CNC2 mixed with 1 wt. % (b), 3 wt. % (c), 5 wt. % (d) and 10 wt. % (e) HNTs.



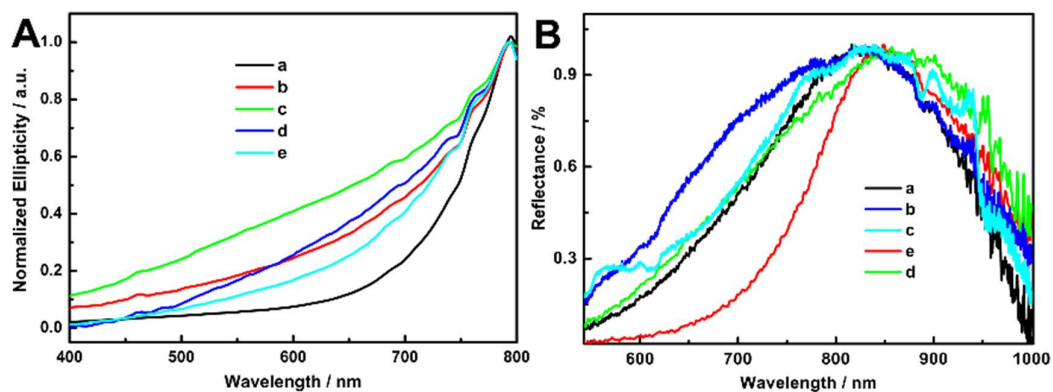

**Fig. S9** (A) Normalized CD spectra of pristine **CNC1** film (a) and composite films of **CNC1** mixed with 1 wt. % HNTs (b), 3 wt. % HNTs (c), 5 wt. % HNTs (d) and 10 wt. % HNTs (e). (B) Normalized reflectance spectra of pristine **CNC1** film (a) and composite films prepared from **CNC1** mixed with 1 wt. % HNTs (b), 3 wt. % HNTs (c), 5 wt. % HNTs (d) and 10 wt. % HNTs (e).
